# Supplementary material
Source: PubMed Central journal article supplement (PMC5543909)
Supplement: jciinsight-2-90049-s002.pdf [file jciinsight-2-90049-s002.pdf]

**Supplementary Table I. Summary of phenotypes.**

| Phenotype                       | Location          | Occurrence (%)                 |                                   |                                 |
|---------------------------------|-------------------|--------------------------------|-----------------------------------|---------------------------------|
|                                 |                   | FSP1-Ext1 <sup>CKO</sup> (n=9) | Col2a1-Ext1 <sup>CKO</sup> (n=12) | Ext1 <sup>flox/flox</sup> (n=9) |
| Osteochondroma<br>in long bones | Humerus, proximal | 78 (%)                         | 58 (%)                            | 0 (%)                           |
|                                 | Humerus, distal   | 78                             | 17                                | 0                               |
|                                 | Ulna, distal      | 78                             | 100                               | 0                               |
|                                 | Radius, distal    | 89                             | 100                               | 0                               |
|                                 | Radius, proximal  | 78                             | 8                                 | 0                               |
|                                 | Femur, distal     | 100                            | 25                                | 0                               |
|                                 | Tibia, proximal   | 89                             | 92                                | 0                               |
|                                 | Tibia, distal     | 56                             | 50                                | 0                               |
|                                 | Fibula, proximal  | 78                             | 58                                | 0                               |
| Osteochondroma<br>in other bone | Scapula           | 100                            | 17                                | 0                               |
|                                 | Vertebrae         | 100                            | 8                                 | 0                               |
|                                 | Rib bones         | 100                            | 100                               | 0                               |
| Bowing<br>deformity             |                   | 100                            | 92                                | 0                               |
| Scoliosis                       |                   | 0                              | 58                                | 0                               |

## Supplementary Table II. Oligonucleotide primers.

| Gene Name     | Sequences                                                                 |
|---------------|---------------------------------------------------------------------------|
| <i>Acan</i>   | Forward 5'-CCCAAGTGGAGTAGCTGAGG-3'<br>Reverse 5'-AGACACAGTGGGGAAACCTG-3'  |
| <i>Col2a1</i> | Forward 5'-CAGGATGCCCGAAAATTAGGG-3'<br>Reverse 5'-ACCACGATCACCTCTGGGT-3'  |
| <i>Ext1</i>   | Forward 5'-CTCCCCTTCGGTCTTTCATC-3'<br>Reverse 5'-TTCCCTGCTCTCTTCTTTTCC-3' |
| <i>Gapdh</i>  | Forward 5'-CAATGACCCCTTCATTGACC-3'<br>Reverse 5'-GACAAGCTTCCCGTTCTCAG-3'  |
| <i>Sox9</i>   | Forward 5'-ACGGCTCCAGCAAGAAACAAG-3'<br>Reverse 5'-TTGTGCAGATGCGGGTACTG-3' |
